# Supplementary material for: Progressive genomic convergence of two Helicobacter pylori strains during mixed infection of a patient with chronic gastritis
Source: PubMed Central journal article supplement — Gut. 2014 Jul 9;64(4):554–61. doi: 10.1136/gutjnl-2014-307345 (PMC4392222; doi:10.1136/gutjnl-2014-307345), 2014-07-09

## Supplementary Figures

**Figure S1.** Four examples of recombined regions including ISR.

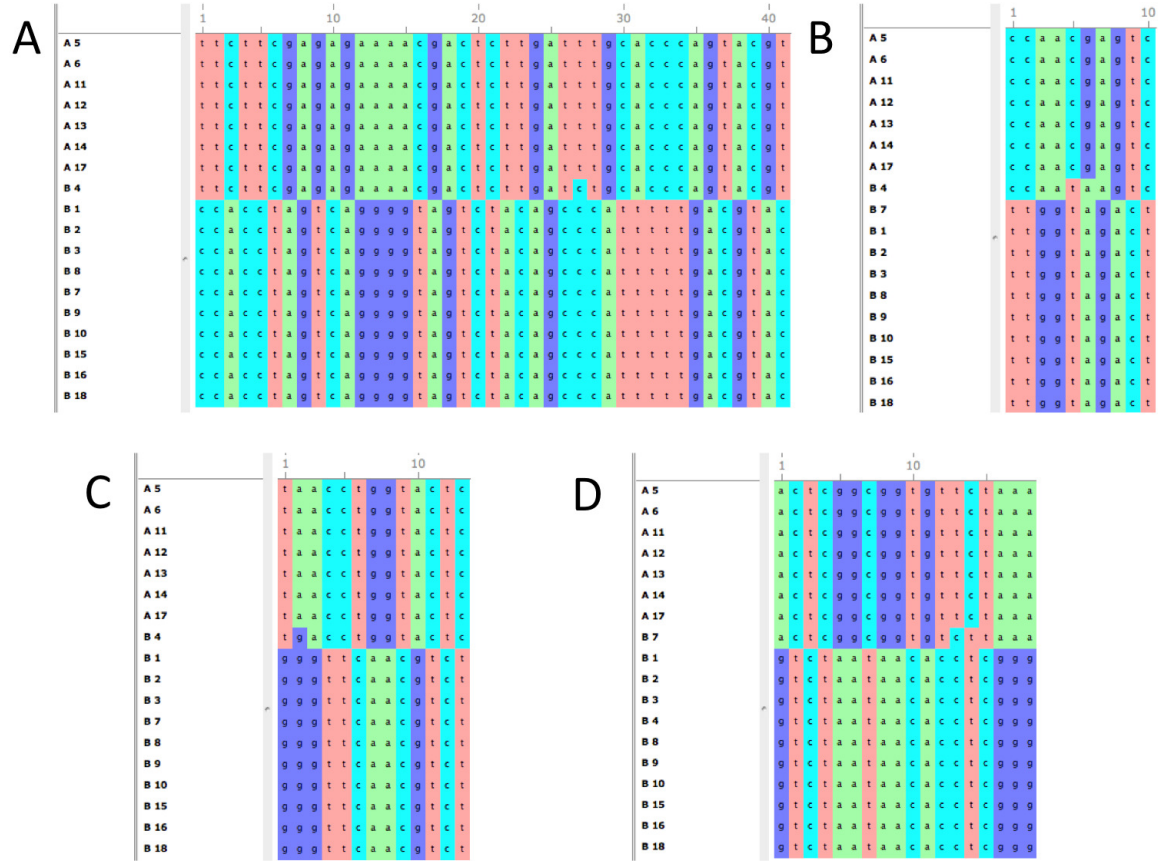

**Figure S2.** The map of the recombination events to the complete annotated reference genome F57. A circular plot showing in red the genes on the forward (outer) and reverse (inner) strands of F57, in black the mapped recombinant segments from clade A (middle) and clade B (outer) and two ancestors (inner), and in the center the GC content.

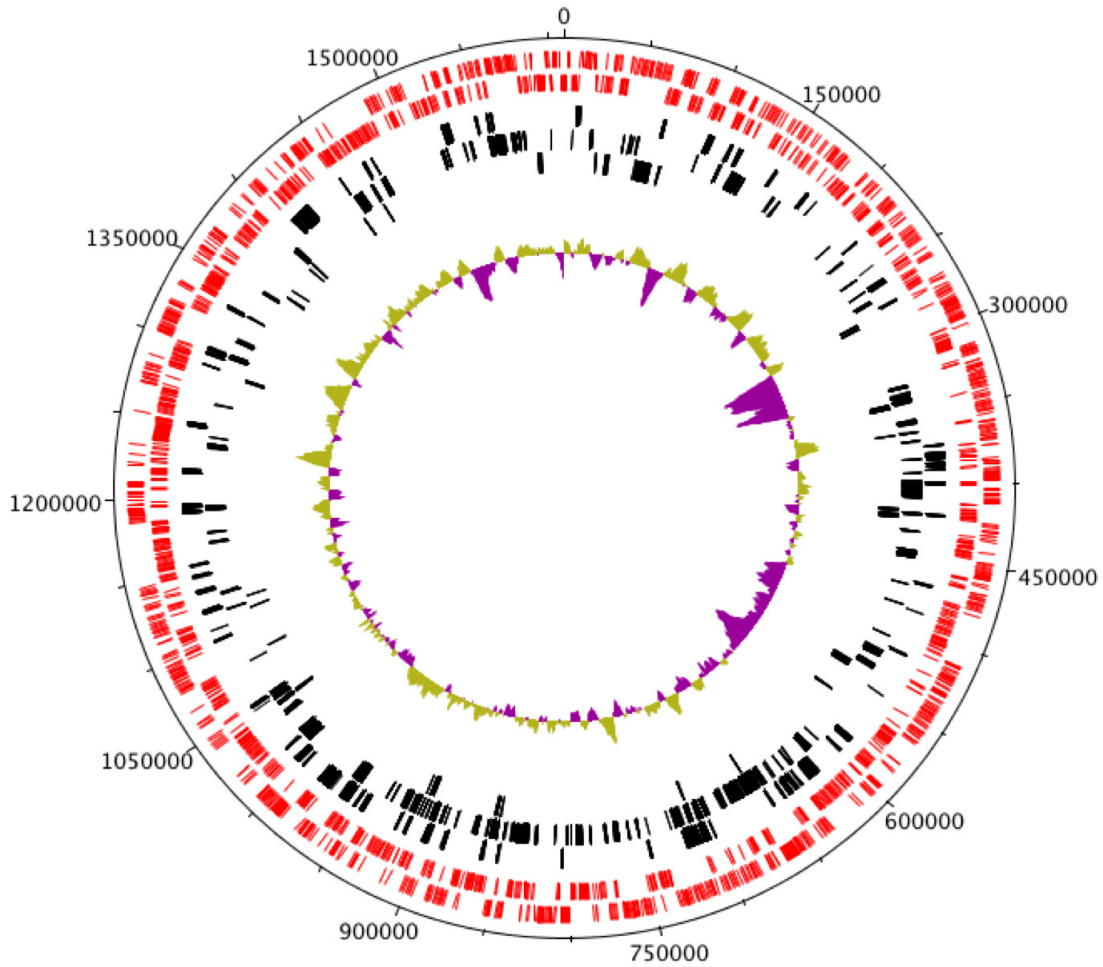

**Figure S3.** Proportion of genes affected by imports for different functional classes of encoded proteins.

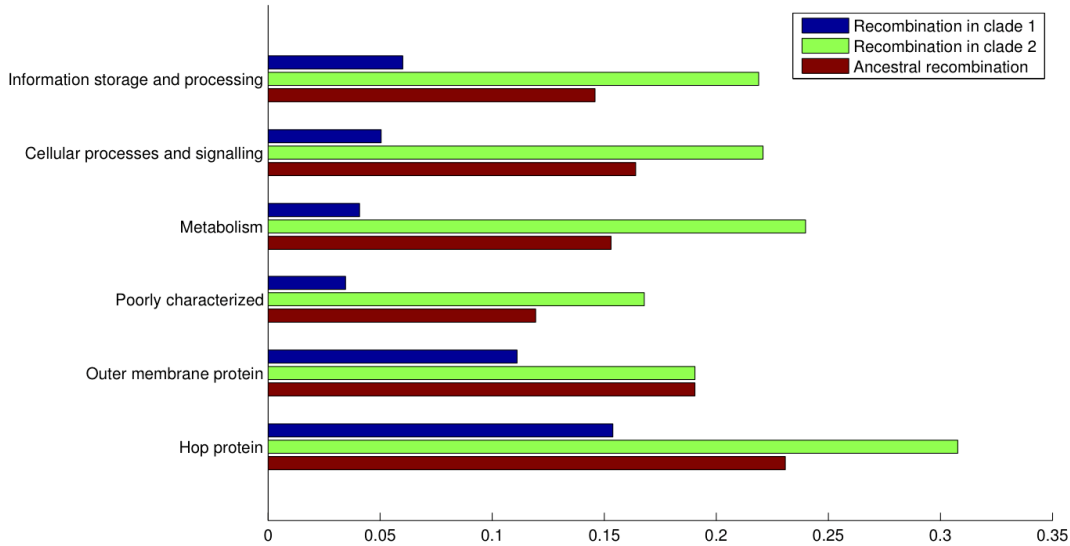

**Figure S4.** Comparison of amino acid sequences of RdxA.

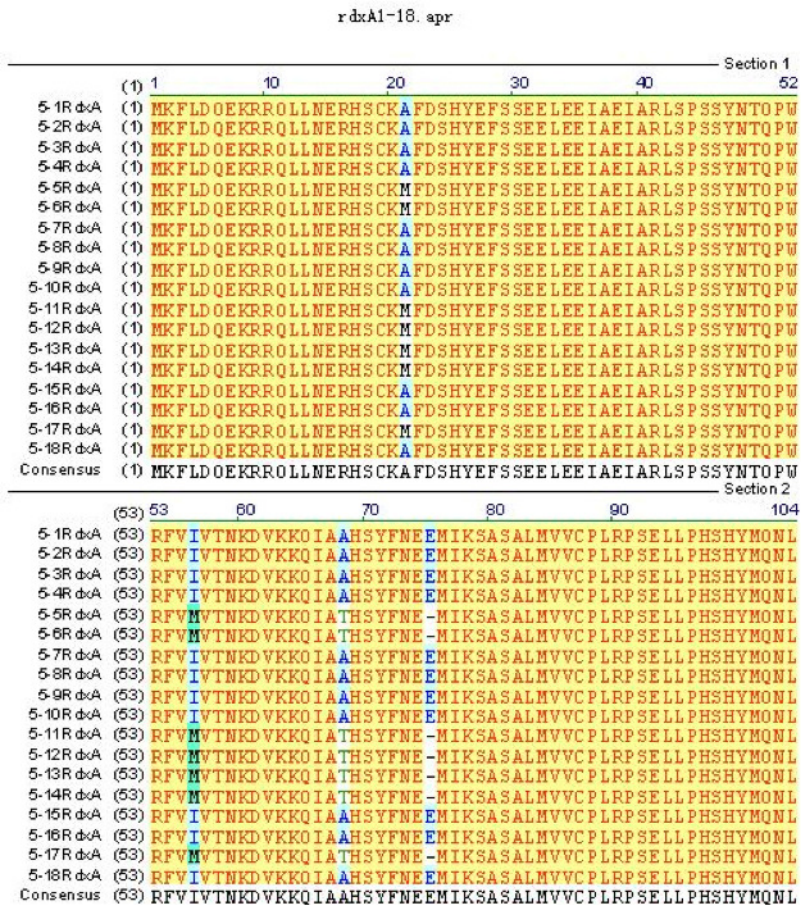

**Figure S5.**Neighbor-Joining tree of the 18 amino acid sequences of RdxA.

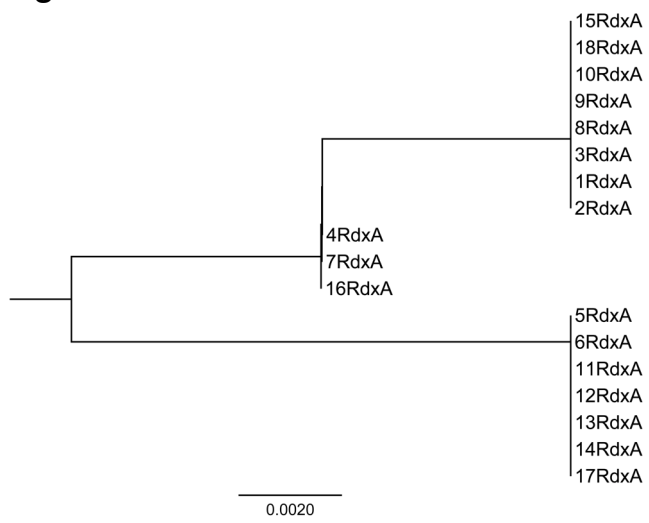

Supplement: gutjnl-2014-307345-s1.pdf [file gutjnl-2014-307345-s1.pdf]
