# Supplementary material for: Progressive genomic convergence of two Helicobacter pylori strains during mixed infection of a patient with chronic gastritis
Source: PubMed Central journal article supplement — Gut. 2014 Jul 9;64(4):554–61. doi: 10.1136/gutjnl-2014-307345 (PMC4392222; doi:10.1136/gutjnl-2014-307345), 2014-07-09
Supplement: gutjnl-2014-307345-s2.pdf [file gutjnl-2014-307345-s2.pdf]

Table S1. The overall properties of 18 *H. pylori* genomes.

| Sample | Accession number | N50    | Contigs | Max contig | Total length | GC content |
|--------|------------------|--------|---------|------------|--------------|------------|
| 1      | JCKE000000000    | 82711  | 53      | 226553     | 1633694      | 38.67%     |
| 2      | JCKD000000000    | 94929  | 48      | 215971     | 1622969      | 38.70%     |
| 3      | AUPD000000000    | 135483 | 91      | 700630     | 1653877      | 38.68%     |
| 4      | JDVV000000000    | 59417  | 56      | 127180     | 1613161      | 38.76%     |
| 5      | JDVU000000000    | 123011 | 38      | 381072     | 1567665      | 38.76%     |
| 6      | JDVT000000000    | 31815  | 87      | 94230      | 1537021      | 38.79%     |
| 7      | JDVS000000000    | 20808  | 227     | 51531      | 1637903      | 38.82%     |
| 8      | JDVR000000000    | 61935  | 59      | 309855     | 1620239      | 38.67%     |
| 9      | JDVQ000000000    | 116442 | 51      | 222163     | 1631592      | 38.63%     |
| 10     | JDVP000000000    | 118253 | 45      | 232500     | 1634549      | 38.65%     |
| 11     | JDVO000000000    | 116953 | 36      | 201992     | 1571809      | 38.77%     |
| 12     | AUPY000000000    | 169199 | 65      | 353098     | 1582646      | 38.78%     |
| 13     | JDVN000000000    | 143344 | 25      | 333917     | 1573989      | 38.80%     |
| 14     | JDVM000000000    | 55354  | 49      | 152072     | 1568848      | 38.80%     |
| 15     | JDVL000000000    | 80649  | 46      | 185920     | 1611095      | 38.70%     |
| 16     | JDVK000000000    | 20043  | 119     | 64518      | 1602856      | 38.86%     |
| 17     | JDVJ000000000    | 90572  | 35      | 237547     | 1564257      | 38.83%     |
| 18     | JDVI000000000    | 64195  | 42      | 286495     | 1626620      | 38.68%     |
