# Supplementary material for: Progressive genomic convergence of two Helicobacter pylori strains during mixed infection of a patient with chronic gastritis
Source: HighWire-hosted journal article supplement (doi:10.1136/gutjnl-2014-307345), 2014-07-09
Supplement: gutjnl-2014-307345supp_tableS5.pdf [file gutjnl-2014-307345supp_tableS5.pdf]

Table S5: Results of antibiotic susceptibility testing.

| Isolate                | Clade | Amo | Cla | Fur | Lev | Tet | Met (MIC: µg/ml) |
|------------------------|-------|-----|-----|-----|-----|-----|------------------|
| Break point<br>(µg/ml) |       | 2   | 1   | 2   | 2   | 2   | 8                |
| 1                      | B     | S   | S   | S   | S   | S   | S(1)             |
| 2                      | B     | S   | S   | S   | S   | S   | S(1)             |
| 3                      | B     | S   | S   | S   | S   | S   | S(2)             |
| 4                      | B     | S   | S   | S   | S   | S   | S(2)             |
| 5                      | A     | S   | S   | S   | S   | S   | R(64)            |
| 6                      | A     | S   | S   | S   | S   | S   | R(16)            |
| 7                      | B     | S   | S   | S   | S   | S   | S(2)             |
| 8                      | B     | S   | S   | S   | S   | S   | S(1)             |
| 9                      | B     | S   | S   | S   | S   | S   | S(1)             |
| 10                     | B     | S   | S   | S   | S   | S   | S(2)             |
| 11                     | A     | S   | S   | S   | S   | S   | R(64)            |
| 12                     | A     | S   | S   | S   | S   | S   | R(64)            |
| 13                     | A     | S   | S   | S   | S   | S   | R(32)            |
| 14                     | A     | S   | S   | S   | S   | S   | R(16)            |
| 15                     | B     | S   | S   | S   | S   | S   | S(1)             |
| 16                     | B     | S   | S   | S   | S   | S   | S(2)             |
| 17                     | A     | S   | S   | S   | S   | S   | R(64)            |
| 18                     | B     | S   | S   | S   | S   | S   | S(1)             |
| 700392                 |       | S   | S   | S   | S   | S   | S(2)             |
| 43504                  |       | S   | S   | S   | S   | S   | R(128)           |

Amoxicillin (Amo), clarithromycin (Cla), furazolidone (Fur), levofloxacin (Lev), tetracycline (Tet) and metronidazole (Met)

S: sensitive; R: resistant
